# Supplementary material for: Exploring the Needs and Expectations of Expectant and New Parents for an mHealth Application to Support the First 1000 Days of Life: Steps toward a Co-Design Approach
Source: MDPI journal article supplement (doi:10.3390/ijerph20021227), 2023-01-10
Supplement: s1 [file s1]

| Domain                         | Item                                                                                                   | Expectant and new parents (N=159) |     |    |   |    |    |    |    |    |    |     |    | Expectant and new mothers (N=91) |     |    |    |    |    |    |    |    |    |    |    | Expectant and new fathers (N=68) |     |   |   |    |    |    |    |    |    |    |    |
|--------------------------------|--------------------------------------------------------------------------------------------------------|-----------------------------------|-----|----|---|----|----|----|----|----|----|-----|----|----------------------------------|-----|----|----|----|----|----|----|----|----|----|----|----------------------------------|-----|---|---|----|----|----|----|----|----|----|----|
|                                |                                                                                                        | M                                 | SD  | 0  |   | 1  |    | 2  |    | 3  |    | 4   |    | M                                | SD  | 0  |    | 1  |    | 2  |    | 3  |    | 4  |    | M                                | SD  | 0 |   | 1  |    | 2  |    | 3  |    | 4  |    |
|                                |                                                                                                        |                                   |     | n  | % | n  | %  | n  | %  | n  | %  | n   | %  |                                  |     | n  | %  | n  | %  | n  | %  | n  | %  | n  | %  |                                  |     | n | % | n  | %  | n  | %  | n  | %  | n  | %  |
| Pregnancy care and counselling | General information about pregnancy (e.g., nutrition/weight gain, fitness, oral health, travel health) | 3.5                               | 0.8 | 2  | 1 | 0  | 0  | 15 | 9  | 39 | 25 | 103 | 65 | 3.4                              | 0.9 | 2  | 2  | 0  | 0  | 10 | 11 | 26 | 29 | 53 | 58 | 3.7                              | 0.6 | 0 | 0 | 0  | 0  | 5  | 7  | 13 | 19 | 50 | 74 |
|                                | Information about drugs that can be taken during pregnancy                                             | 3.4                               | 0.9 | 3  | 2 | 5  | 3  | 11 | 7  | 50 | 31 | 90  | 57 | 3.3                              | 0.9 | 1  | 1  | 4  | 4  | 5  | 5  | 34 | 37 | 47 | 52 | 3.4                              | 0.9 | 2 | 3 | 1  | 1  | 6  | 9  | 16 | 24 | 43 | 63 |
|                                | Information about vitamin supplement during pregnancy                                                  | 3.1                               | 0.9 | 1  | 1 | 4  | 3  | 36 | 23 | 61 | 38 | 57  | 36 | 3.1                              | 0.9 | 1  | 1  | 3  | 3  | 19 | 21 | 35 | 38 | 33 | 36 | 3.1                              | 0.8 | 0 | 0 | 1  | 1  | 17 | 25 | 26 | 38 | 24 | 35 |
|                                | A list of free-of-charge and upon payment examinations to be carried out during pregnancy              | 3.5                               | 0.7 | 1  | 1 | 1  | 1  | 17 | 11 | 48 | 30 | 93  | 58 | 3.4                              | 0.8 | 1  | 1  | 1  | 1  | 10 | 11 | 28 | 31 | 52 | 57 | 3.5                              | 0.7 | 0 | 0 | 0  | 0  | 7  | 10 | 20 | 29 | 41 | 60 |
|                                | Information about infections that can occur during pregnancy (e.g., toxoplasmosis, cytomegalovirus)    | 3.5                               | 0.8 | 3  | 2 | 0  | 0  | 11 | 7  | 48 | 30 | 97  | 61 | 3.4                              | 0.9 | 3  | 3  | 0  | 0  | 8  | 9  | 27 | 30 | 53 | 58 | 3.6                              | 0.6 | 0 | 0 | 0  | 0  | 3  | 4  | 21 | 31 | 44 | 65 |
|                                | Information about the immunizations that the mother needs to receive during pregnancy                  | 3.2                               | 1.0 | 5  | 3 | 1  | 1  | 28 | 18 | 52 | 33 | 73  | 46 | 3.2                              | 1.0 | 4  | 4  | 1  | 1  | 11 | 12 | 30 | 33 | 45 | 49 | 3.1                              | 0.9 | 1 | 1 | 0  | 0  | 17 | 25 | 22 | 32 | 28 | 41 |
|                                | Information about voluntary pregnancy interruption                                                     | 2.5                               | 1.3 | 15 | 9 | 21 | 13 | 37 | 23 | 44 | 28 | 42  | 26 | 2.5                              | 1.3 | 10 | 11 | 11 | 12 | 19 | 21 | 28 | 31 | 23 | 25 | 2.5                              | 1.3 | 5 | 7 | 10 | 15 | 18 | 26 | 16 | 24 | 19 | 28 |
|                                | Information about spontaneous miscarriage                                                              | 3.0                               | 1.0 | 6  | 4 | 7  | 4  | 28 | 18 | 59 | 37 | 59  | 37 | 3.0                              | 1.0 | 3  | 3  | 4  | 4  | 14 | 15 | 36 | 40 | 34 | 37 | 2.9                              | 1.1 | 3 | 4 | 3  | 4  | 14 | 21 | 23 | 34 | 25 | 37 |
|                                | Information about violence/abuse during pregnancy                                                      | 2.6                               | 1.3 | 15 | 9 | 14 | 9  | 39 | 25 | 43 | 27 | 48  | 30 | 2.6                              | 1.3 | 10 | 11 | 7  | 8  | 19 | 21 | 25 | 27 | 30 | 33 | 2.5                              | 1.2 | 5 | 7 | 7  | 10 | 20 | 29 | 18 | 26 | 18 | 26 |
|                                | Information about possible problems related to pregnancy                                               | 3.3                               | 0.9 | 4  | 3 | 3  | 2  | 18 | 11 | 46 | 29 | 88  | 55 | 3.3                              | 1.0 | 4  | 4  | 2  | 2  | 7  | 8  | 26 | 29 | 52 | 57 | 3.3                              | 0.8 | 0 | 0 | 1  | 1  | 11 | 16 | 20 | 29 | 36 | 53 |
|                                | Information on fetal development                                                                       | 3.6                               | 0.7 | 1  | 1 | 1  | 1  | 8  | 5  | 47 | 30 | 102 | 64 | 3.5                              | 0.8 | 1  | 1  | 1  | 1  | 7  | 8  | 23 | 25 | 59 | 65 | 3.6                              | 0.5 | 0 | 0 | 0  | 0  | 1  | 1  | 24 | 35 | 43 | 63 |
|                                | Information about fetal movements                                                                      | 3.3                               | 0.9 | 3  | 2 | 4  | 3  | 21 | 13 | 53 | 33 | 78  | 49 | 3.4                              | 0.9 | 3  | 3  | 0  | 0  | 6  | 7  | 31 | 34 | 51 | 56 | 3.1                              | 0.9 | 0 | 0 | 4  | 6  | 15 | 22 | 22 | 32 | 27 | 40 |
|                                | Information about prevention measures during pregnancy (e.g.,                                          | 2.9                               | 1.0 | 4  | 3 | 8  | 5  | 39 | 25 | 53 | 33 | 55  | 35 | 2.9                              | 1.1 | 3  | 3  | 6  | 7  | 19 | 21 | 28 | 31 | 35 | 38 | 2.9                              | 0.9 | 1 | 1 | 2  | 3  | 20 | 29 | 25 | 37 | 20 | 29 |





|                                  |                                                                                                                                                               |     |     |    |    |    |    |    |    |    |    |    |    |     |     |   |   |    |    |    |    |    |    |    |    |     |     |   |    |    |    |    |    |    |    |    |    |
|----------------------------------|---------------------------------------------------------------------------------------------------------------------------------------------------------------|-----|-----|----|----|----|----|----|----|----|----|----|----|-----|-----|---|---|----|----|----|----|----|----|----|----|-----|-----|---|----|----|----|----|----|----|----|----|----|
| Reminders and push notifications | App's ability to send push notification reminders when the pregnancy month/trimester begins                                                                   | 2.5 | 1.1 | 4  | 3  | 27 | 17 | 47 | 30 | 50 | 31 | 31 | 19 | 2.7 | 1.1 | 2 | 2 | 13 | 14 | 23 | 25 | 28 | 31 | 25 | 27 | 2.2 | 1.0 | 2 | 3  | 14 | 21 | 24 | 35 | 22 | 32 | 6  | 9  |
|                                  | App's ability to schedule reminders for routine activities (e.g., drinking, diapering, feeding, pumping, and sleeping)                                        | 2.1 | 1.1 | 16 | 10 | 26 | 16 | 59 | 37 | 40 | 25 | 18 | 11 | 2.2 | 1.1 | 7 | 8 | 13 | 14 | 36 | 40 | 25 | 27 | 10 | 11 | 2.0 | 1.2 | 9 | 13 | 13 | 19 | 23 | 34 | 15 | 22 | 8  | 12 |
|                                  | App's ability to change reminders and notifications settings                                                                                                  | 2.8 | 1.0 | 2  | 1  | 17 | 11 | 36 | 23 | 60 | 38 | 44 | 28 | 2.9 | 1.0 | 1 | 1 | 9  | 10 | 16 | 18 | 39 | 43 | 26 | 29 | 2.7 | 1.0 | 1 | 1  | 8  | 12 | 20 | 29 | 21 | 31 | 18 | 26 |
| Notes and records                | App's ability to record the latest period date or the expected delivery date                                                                                  | 2.9 | 1.0 | 2  | 1  | 11 | 7  | 40 | 25 | 52 | 33 | 54 | 34 | 3.1 | 1.0 | 2 | 2 | 3  | 3  | 18 | 20 | 29 | 32 | 39 | 43 | 2.7 | 1.0 | 0 | 0  | 8  | 12 | 22 | 32 | 23 | 34 | 15 | 22 |
|                                  | App's ability to change the expected delivery date following medical re-evaluation                                                                            | 3.0 | 1.0 | 2  | 1  | 9  | 6  | 32 | 20 | 57 | 36 | 59 | 37 | 3.1 | 0.9 | 2 | 2 | 3  | 3  | 13 | 14 | 36 | 40 | 37 | 41 | 2.9 | 1.0 | 0 | 0  | 6  | 9  | 19 | 28 | 21 | 31 | 22 | 32 |
|                                  | App's ability to record physiological values of the mother (e.g., pressure, temperature, and mood)                                                            | 2.9 | 1.0 | 4  | 3  | 10 | 6  | 35 | 22 | 54 | 34 | 56 | 35 | 2.9 | 1.0 | 3 | 3 | 3  | 3  | 23 | 25 | 30 | 33 | 32 | 35 | 2.9 | 1.0 | 1 | 1  | 7  | 10 | 12 | 18 | 24 | 35 | 24 | 35 |
|                                  | App's ability to record contractions or kicks                                                                                                                 | 3.0 | 1.0 | 2  | 1  | 13 | 8  | 32 | 20 | 49 | 31 | 63 | 40 | 3.2 | 1.0 | 1 | 1 | 4  | 4  | 17 | 19 | 27 | 30 | 42 | 46 | 2.8 | 1.1 | 1 | 1  | 9  | 13 | 15 | 22 | 22 | 32 | 21 | 31 |
|                                  | App's ability to record routine activities of the mother or the newborn (e.g., drinking, steps, diapers changes, bottle feeding, and sleeping patterns/times) | 2.3 | 1.1 | 10 | 6  | 24 | 15 | 60 | 38 | 45 | 28 | 20 | 13 | 2.4 | 1.1 | 6 | 7 | 11 | 12 | 32 | 35 | 29 | 32 | 13 | 14 | 2.1 | 1.0 | 4 | 6  | 13 | 19 | 28 | 41 | 16 | 24 | 7  | 10 |
|                                  | App's ability to record the medical care the mother or the newborn has received (e.g., medications and vaccination shots)                                     | 2.9 | 1.0 | 3  | 2  | 8  | 5  | 43 | 27 | 58 | 36 | 47 | 30 | 2.9 | 1.0 | 2 | 2 | 5  | 5  | 25 | 27 | 27 | 30 | 32 | 35 | 2.8 | 0.9 | 1 | 1  | 3  | 4  | 18 | 26 | 31 | 46 | 15 | 22 |
|                                  | App's ability to track the newborn's developmental milestones                                                                                                 | 2.8 | 0.9 | 3  | 2  | 8  | 5  | 42 | 26 | 65 | 41 | 41 | 26 | 2.9 | 1.0 | 2 | 2 | 5  | 5  | 21 | 23 | 36 | 40 | 27 | 30 | 2.8 | 0.9 | 1 | 1  | 3  | 4  | 21 | 31 | 29 | 43 | 14 | 21 |

|                                                                                                                                      |                                                                                                                   |                                                                       |     |     |    |    |    |    |    |    |    |    |    |     |     |     |    |    |    |    |    |    |    |    |    |     |     |     |    |    |    |    |    |    |    |    |    |
|--------------------------------------------------------------------------------------------------------------------------------------|-------------------------------------------------------------------------------------------------------------------|-----------------------------------------------------------------------|-----|-----|----|----|----|----|----|----|----|----|----|-----|-----|-----|----|----|----|----|----|----|----|----|----|-----|-----|-----|----|----|----|----|----|----|----|----|----|
|                                                                                                                                      | App's ability to record anthropometric measurements of the fetus (e.g., height, weight, and head circumference)   | 3.0                                                                   | 0.9 | 2   | 1  | 7  | 4  | 39 | 25 | 55 | 35 | 56 | 35 | 3.1 | 1.0 | 1   | 1  | 5  | 5  | 18 | 20 | 31 | 34 | 36 | 40 | 2.9 | 0.9 | 1   | 1  | 2  | 3  | 21 | 31 | 24 | 35 | 20 | 29 |
|                                                                                                                                      | App's ability to record anthropometric measurements of the newborn (e.g., height, weight, and head circumference) | 3.0                                                                   | 1.0 | 2   | 1  | 9  | 6  | 34 | 21 | 54 | 34 | 60 | 38 | 3.1 | 1.0 | 1   | 1  | 6  | 6  | 15 | 16 | 31 | 34 | 38 | 42 | 2.9 | 1.0 | 1   | 1  | 3  | 4  | 19 | 28 | 23 | 34 | 22 | 32 |
|                                                                                                                                      | App's ability to record measurements of the mother's weight at baseline and during pregnancy                      | 2.6                                                                   | 1.0 | 4   | 3  | 13 | 8  | 50 | 31 | 62 | 39 | 30 | 19 | 2.8 | 1.0 | 2   | 2  | 9  | 10 | 19 | 21 | 39 | 43 | 22 | 24 | 2.5 | 0.9 | 2   | 3  | 4  | 6  | 31 | 46 | 23 | 34 | 8  | 12 |
|                                                                                                                                      | App's ability to record measurements of the mother's weight in the postnatal period                               | 2.5                                                                   | 1.0 | 4   | 3  | 22 | 14 | 48 | 30 | 63 | 40 | 22 | 14 | 2.6 | 1.0 | 2   | 2  | 13 | 14 | 20 | 22 | 40 | 44 | 16 | 18 | 2.3 | 0.9 | 2   | 3  | 9  | 13 | 28 | 41 | 23 | 34 | 6  | 9  |
|                                                                                                                                      | App's ability to create a sleep diary for the mother                                                              | 2.2                                                                   | 1.0 | 7   | 4  | 25 | 16 | 64 | 40 | 51 | 32 | 12 | 8  | 2.3 | 1.0 | 4   | 4  | 12 | 13 | 35 | 38 | 32 | 35 | 8  | 9  | 2.1 | 0.9 | 3   | 4  | 13 | 19 | 29 | 43 | 19 | 28 | 4  | 6  |
|                                                                                                                                      | App's ability to create a sleep diary for the newborn                                                             | 2.5                                                                   | 1.0 | 4   | 3  | 21 | 13 | 43 | 27 | 69 | 43 | 22 | 14 | 2.6 | 1.0 | 3   | 3  | 10 | 11 | 21 | 23 | 42 | 46 | 15 | 16 | 2.4 | 0.9 | 1   | 1  | 11 | 16 | 22 | 32 | 27 | 40 | 7  | 10 |
|                                                                                                                                      | Social support                                                                                                    | Integration of the app with social networks (e.g., Facebook, Twitter) | 1.3 | 1.2 | 50 | 31 | 42 | 26 | 45 | 28 | 13 | 8  | 9  | 6   | 1.6 | 1.1 | 16 | 18 | 26 | 29 | 32 | 35 | 12 | 13 | 5  | 5   | 0.9 | 1.1 | 34 | 50 | 16 | 24 | 13 | 19 | 1  | 1  | 4  |
| Presence of a FAQ (frequently asked questions) page in the app                                                                       |                                                                                                                   | 2.5                                                                   | 1.0 | 6   | 4  | 22 | 14 | 47 | 30 | 60 | 38 | 24 | 15 | 2.5 | 1.1 | 6   | 7  | 10 | 11 | 24 | 26 | 36 | 40 | 15 | 16 | 2.4 | 0.9 | 0   | 0  | 12 | 18 | 23 | 34 | 24 | 35 | 9  | 13 |
| Presence of social mechanisms allowing the user to interact with each other and share experiences (e.g., community, forum, and chat) |                                                                                                                   | 2.1                                                                   | 1.2 | 18  | 11 | 33 | 21 | 49 | 31 | 39 | 25 | 20 | 13 | 2.3 | 1.2 | 8   | 9  | 16 | 18 | 25 | 27 | 26 | 29 | 16 | 18 | 1.8 | 1.1 | 10  | 15 | 17 | 25 | 24 | 35 | 13 | 19 | 4  | 6  |
| Presence of social mechanisms allowing the user to interact with healthcare staff (e.g., community, forum, and chat)                 |                                                                                                                   | 3.0                                                                   | 1.0 | 3   | 2  | 9  | 6  | 25 | 16 | 64 | 40 | 58 | 36 | 3.1 | 1.0 | 3   | 3  | 4  | 4  | 13 | 14 | 34 | 37 | 37 | 41 | 3.0 | 0.9 | 0   | 0  | 5  | 7  | 12 | 18 | 30 | 44 | 21 | 31 |
| App technical                                                                                                                        | Authentication request to the user                                                                                | 2.9                                                                   | 1.1 | 6   | 4  | 16 | 10 | 25 | 16 | 52 | 33 | 60 | 38 | 2.9 | 1.2 | 4   | 4  | 9  | 10 | 17 | 19 | 27 | 30 | 34 | 37 | 3.0 | 1.1 | 2   | 3  | 7  | 10 | 8  | 12 | 25 | 37 | 26 | 38 |

|                                                                                                                                                                 |     |     |    |    |    |    |    |    |    |    |    |    |     |     |    |    |    |    |    |    |    |    |    |    |     |     |   |   |    |    |    |    |    |    |    |    |
|-----------------------------------------------------------------------------------------------------------------------------------------------------------------|-----|-----|----|----|----|----|----|----|----|----|----|----|-----|-----|----|----|----|----|----|----|----|----|----|----|-----|-----|---|---|----|----|----|----|----|----|----|----|
| Presence of a privacy policy in the app                                                                                                                         | 2.8 | 1.1 | 7  | 4  | 12 | 8  | 35 | 22 | 53 | 33 | 52 | 33 | 2.8 | 1.1 | 4  | 4  | 4  | 4  | 24 | 26 | 30 | 33 | 29 | 32 | 2.8 | 1.2 | 3 | 4 | 8  | 12 | 11 | 16 | 23 | 34 | 23 | 34 |
| If present, availability of a privacy policy properly written in Italian                                                                                        | 2.7 | 1.2 | 8  | 5  | 18 | 11 | 33 | 21 | 50 | 31 | 50 | 31 | 2.7 | 1.2 | 5  | 5  | 8  | 9  | 21 | 23 | 29 | 32 | 28 | 31 | 2.7 | 1.2 | 3 | 4 | 10 | 15 | 12 | 18 | 21 | 31 | 22 | 32 |
| Ability for the user to access all app content for free (without any payment)                                                                                   | 3.4 | 0.9 | 1  | 1  | 8  | 5  | 8  | 5  | 44 | 28 | 98 | 62 | 3.5 | 0.8 | 1  | 1  | 3  | 3  | 4  | 4  | 26 | 29 | 57 | 63 | 3.4 | 0.9 | 0 | 0 | 5  | 7  | 4  | 6  | 18 | 26 | 41 | 60 |
| Access to full app usage based on specific inclusion criteria (e.g., national health service card, place of living, and certification by a health professional) | 2.7 | 1.1 | 6  | 4  | 19 | 12 | 42 | 26 | 44 | 28 | 48 | 30 | 2.7 | 1.2 | 5  | 5  | 9  | 10 | 21 | 23 | 28 | 31 | 28 | 31 | 2.6 | 1.1 | 1 | 1 | 10 | 15 | 21 | 31 | 16 | 24 | 20 | 29 |
| Requirement for the user to sign an informed consent to use the app                                                                                             | 2.6 | 1.2 | 10 | 6  | 23 | 14 | 30 | 19 | 50 | 31 | 46 | 29 | 2.7 | 1.2 | 7  | 8  | 8  | 9  | 16 | 18 | 30 | 33 | 30 | 33 | 2.5 | 1.2 | 3 | 4 | 15 | 22 | 14 | 21 | 20 | 29 | 16 | 24 |
| Presence of references about the contents provided through the app                                                                                              | 2.6 | 1.1 | 5  | 3  | 25 | 16 | 34 | 21 | 52 | 33 | 43 | 27 | 2.7 | 1.0 | 2  | 2  | 11 | 12 | 21 | 23 | 35 | 38 | 22 | 24 | 2.6 | 1.2 | 3 | 4 | 14 | 21 | 13 | 19 | 17 | 25 | 21 | 31 |
| Presence of a glossary of the most used medical terms                                                                                                           | 2.9 | 1.0 | 4  | 3  | 11 | 7  | 36 | 23 | 52 | 33 | 56 | 35 | 2.8 | 1.1 | 2  | 2  | 8  | 9  | 25 | 27 | 26 | 29 | 30 | 33 | 3.0 | 1.0 | 2 | 3 | 3  | 4  | 11 | 16 | 26 | 38 | 26 | 38 |
| Declaration (through the provision of specific references) of the scientific responsibility of the contents provided through the app                            | 2.5 | 1.1 | 8  | 5  | 19 | 12 | 47 | 30 | 48 | 30 | 37 | 23 | 2.5 | 1.1 | 6  | 7  | 8  | 9  | 28 | 31 | 28 | 31 | 21 | 23 | 2.5 | 1.1 | 2 | 3 | 11 | 16 | 19 | 28 | 20 | 29 | 16 | 24 |
| Possibility to back-up/restore data within the app                                                                                                              | 2.5 | 1.1 | 7  | 4  | 18 | 11 | 57 | 36 | 43 | 27 | 34 | 21 | 2.5 | 1.2 | 6  | 7  | 11 | 12 | 28 | 31 | 26 | 29 | 20 | 22 | 2.5 | 1.0 | 1 | 1 | 7  | 10 | 29 | 43 | 17 | 25 | 14 | 21 |
| Possibility to download data collected through the app                                                                                                          | 2.7 | 1.0 | 5  | 3  | 12 | 8  | 50 | 31 | 50 | 31 | 42 | 26 | 2.7 | 1.1 | 4  | 4  | 8  | 9  | 26 | 29 | 27 | 30 | 26 | 29 | 2.7 | 0.9 | 1 | 1 | 4  | 6  | 24 | 35 | 23 | 34 | 16 | 24 |
| Presence of multilanguage support                                                                                                                               | 2.8 | 1.1 | 8  | 5  | 12 | 8  | 40 | 25 | 45 | 28 | 54 | 34 | 2.8 | 1.2 | 5  | 5  | 7  | 8  | 21 | 23 | 26 | 29 | 32 | 35 | 2.8 | 1.1 | 3 | 4 | 5  | 7  | 19 | 28 | 19 | 28 | 22 | 32 |
| App's ability to geolocate the user to provide more detailed information                                                                                        | 2.0 | 1.2 | 22 | 14 | 34 | 21 | 49 | 31 | 32 | 20 | 22 | 14 | 2.0 | 1.4 | 16 | 18 | 19 | 21 | 19 | 21 | 21 | 23 | 16 | 18 | 1.9 | 1.0 | 6 | 9 | 15 | 22 | 30 | 44 | 11 | 16 | 6  | 9  |
| App's ability to book visits, vaccinations, and checkups                                                                                                        | 3.4 | 0.8 | 1  | 1  | 5  | 3  | 15 | 9  | 46 | 29 | 92 | 58 | 3.4 | 0.9 | 1  | 1  | 3  | 3  | 11 | 12 | 24 | 26 | 52 | 57 | 3.5 | 0.7 | 0 | 0 | 2  | 3  | 4  | 6  | 22 | 32 | 40 | 59 |
| App's ability to update users'                                                                                                                                  | 3.0 | 0.9 | 2  | 1  | 9  | 6  | 31 | 19 | 66 | 42 | 51 | 32 | 2.9 | 1.0 | 2  | 2  | 6  | 7  | 17 | 19 | 36 | 40 | 30 | 33 | 3.0 | 0.8 | 0 | 0 | 3  | 4  | 14 | 21 | 30 | 44 | 21 | 31 |
